# Supplementary material for: Rationally Designed Novel Antimicrobial Peptides Targeting Chitin Synthase for Combating Soybean Phytophthora Blight
Source: MDPI journal article supplement (doi:10.3390/ijms25063512), 2024-03-20
Supplement: s1 [file s1]

---

Supporting Information

# Rationally Designed Novel Antimicrobial Peptides Targeting Chitin Synthase for Combating Soybean Phytophthora Blight

Yue Ran, Kiran Shehzadi, Jian-Hua Liang \* and Ming-Jia Yu \*

School of Chemistry and Chemical Engineering, Beijing Institute of Technology, Beijing 100081, China

\* Correspondence: ljhbit@bit.edu.cn (J.-H.L.); mjyu@bit.edu.cn (M.-J.Y.)

## Contents

|                                                                                                       |   |
|-------------------------------------------------------------------------------------------------------|---|
| Table S1: Library of antimicrobial peptides with inhibitory activity against <i>Phytophthora</i> ..   | 2 |
| Table S2: The interaction of hydrogen bonds between AMP_04 and chitin synthase..                      | 3 |
| Table S3: The interaction of hydrogen bonds between DP and chitin synthase.                           | 3 |
| Table S4: The interaction of hydrogen bonds between TP and chitin synthase.....                       | 4 |
| Figure S1: The interaction between the receptor (in deep blue) and the ligand displayed by LigPlot+.. | 5 |
| Figure S2: Molecular dynamics simulation results between TP and chitin synthase.....                  | 6 |
| Figure S3: Predicting pLDDT plots of four antimicrobial peptides using alphafold2..                   | 7 |

**Table S1.** Library of antimicrobial peptides with inhibitory activity against *Phytophthora*.

| Serial number | Amino acid sequence                                                                                  | Plant pathogen                     | Inhibition efficacy               | Reference |
|---------------|------------------------------------------------------------------------------------------------------|------------------------------------|-----------------------------------|-----------|
| 01            | NH <sub>2</sub> -GIGKFLHSAKKFGKAF<br>VGEIMNS-COOH                                                    | <i>Phytophthora infestans</i>      | MIC=40<br>(µg/ml)                 | 1         |
| 02            | NH <sub>2</sub> -GLWGTLGGLFGWLGA<br>AGKTTGSARAKQRLKLMAG<br>-COOH                                     | <i>Phytophthora infestans</i>      | MIC=20<br>(µg/ml)                 | 1         |
| 03            | NH <sub>2</sub> -KWKVFKKIEKMGRNIR<br>NGIVKAGPAIAVLGEAKAL-<br>COOH                                    | <i>Phytophthora infestans</i>      | MIC=20<br>(µg/ml)                 | 1         |
| 04            | NH <sub>2</sub> -EWKLLKKIGAVLKLKLV-C<br>OOH                                                          | <i>Phytophthora infestans</i>      | MIC=15 (µM)                       | 2         |
| 05            | NH <sub>2</sub> -KWKLFFKKILKVL-COO<br>H                                                              | <i>Phytophthora infestans</i>      | MIC=15 (µM)                       | 2         |
| 06            | NH <sub>2</sub> -WKLFKKILKVL-COOH                                                                    | <i>Phytophthora infestans</i>      | MIC=15 (µM)                       | 2         |
| 07            | NH <sub>2</sub> -KWKLFFKKIGIGAVLKV<br>LTTGLPALIS-COOH                                                | <i>Phytophthora infestans</i>      | MIC=40 (µM)                       | 2         |
| 08            | NH <sub>2</sub> -GIFSKLAGKKLKNLLIS<br>GL-COOH                                                        | <i>Phytophthora<br/>nicotianae</i> | MIC=12 (µM)                       | 3         |
| 09            | NH <sub>2</sub> -GIFSKLAGKKLKNLLIS<br>GLKNVGKEVGLDVVRTGIDI<br>AGCKIKGEC-COOH                         | <i>Phytophthora<br/>nicotianae</i> | MIC=75 (µM)                       | 3         |
| 10            | NH <sub>2</sub> -EGPVGLADPDGPASAP<br>LGAP-COOH                                                       | <i>Phytophthora capsici</i>        | EC <sub>50</sub> =3.14<br>(µg/ml) | 4         |
| 11            | NH <sub>2</sub> -FRLKFH-COOH                                                                         | <i>Phytophthora infestans</i>      | IC <sub>50</sub> =56 (µM)         | 5         |
| 12            | NH <sub>2</sub> -RLARLAR-COOH                                                                        | <i>Phytophthora infestans</i>      | IC <sub>50</sub> =910 (µM)        | 5         |
| 13            | NH <sub>2</sub> -WKLFKKILKVL-COOH                                                                    | <i>Phytophthora infestans</i>      | IC <sub>50</sub> =17 (µM)         | 5         |
| 14            | NH <sub>2</sub> -MASRAARLAARLARLA<br>LRAL-COOH                                                       | <i>Phytophthora infestans</i>      | IC <sub>50</sub> =14 (µM)         | 5         |
| 15            | NH <sub>2</sub> -YSYKKIDCGGACAARO<br>RLSSRPRLCNRACGTCCARC<br>NCVPPGTSGNTETCPCYASL<br>TTHGNKRKCP-COOH | <i>Phytophthora cucumerina</i>     | EC <sub>50</sub> =10 (µM)         | 6         |
| 16            | NH <sub>2</sub> -GSNFCDSKCKLRCSKA                                                                    | <i>Phytophthora cucumerina</i>     | EC <sub>50</sub> =10 (µM)         | 6         |

GLADRCLKYCGICOECKVV

PSGTYGNKHECPCYRDKN

SKGKSKCP-COOH

**Table S2.** The interaction of hydrogen bonds between AMP\_04 and chitin synthase.

| Antimicrobial peptide | Receptor residue | Ligand residue | Hydrogen bond [Å] | Hydrogen bond angle [°] |
|-----------------------|------------------|----------------|-------------------|-------------------------|
| AMP_04                | r:SER534         | l:ASP8         | 2.4064            | 131.532                 |
|                       | r:ASP382         | l:ALA13        | 2.2816            | 149.906                 |
|                       | r:PRO454         | l:SER14        | 1.9174            | 173.496                 |
|                       | r:ASP440         | l:GLY18        | 2.5774            | 119.957                 |
|                       | r:LYS355         | l:GLY2         | 1.9231            | 143.658                 |
|                       | r:SER436         | l:PRO16        | 2.1238            | 157.535                 |
|                       | r:SER436         | l:LEU17        | 2.3747            | 100.13                  |
|                       | r:SER451         | l:PRO20        | 2.5826            | 160.587                 |
|                       | r:ARG497         | l:PRO20        | 2.0833            | 129.641                 |
|                       | r:LYS537         | l:LEU6         | 2.4322            | 135.489                 |
|                       | r:ARG538         | l:GLU1         | 2.7702            | 118.131                 |
|                       | r:ARG538         | l:PRO9         | 2.5881            | 130.017                 |
|                       | r:ARG538         | l:PRO3         | 2.299             | 116.71                  |
|                       | r:TRP539         | l:ALA13        | 2.9607            | 106.998                 |
|                       | r:TYR492         | l:PRO3         | 2.4986            | 140.745                 |
|                       | r:ASP524         | l:PRO12        | 3.0166            | 128.342                 |
|                       | r:ASP382         | l:PRO12        | 2.623             | 143.675                 |
|                       | r:PRO454         | l:ALA13        | 2.6924            | 130.504                 |
|                       | r:ARG538         | l:ASP8         | 3.0407            | 118.905                 |

**Table S3.** The interaction of hydrogen bonds between DP and chitin synthase.

| Antimicrobial peptide    | Receptor residue | Ligand residue | Hydrogen bond [Å] | Hydrogen bond angle [°] |
|--------------------------|------------------|----------------|-------------------|-------------------------|
| AMP_04_D10k_S14L<br>(DP) | r:SER534         | l:ASP8         | 2.4061            | 131.554                 |
|                          | r:VAL383         | l:LYS10        | 2.7573            | 125.104                 |
|                          | r:GLU241         | l:LYS10        | 2.2056            | 153.118                 |
|                          | r:GLN245         | l:LYS10        | 2.0885            | 120.851                 |
|                          | r:ASP382         | l:ALA13        | 2.2695            | 149.456                 |
|                          | r:PRO454         | l:LEU14        | 1.9228            | 170.018                 |
|                          | r:ASP440         | l:GLY18        | 2.5774            | 119.957                 |
|                          | r:LYS355         | l:GLY2         | 1.9236            | 143.631                 |
|                          | r:SER436         | l:PRO16        | 2.1215            | 157.315                 |
|                          | r:SER436         | l:LEU17        | 2.3509            | 101.574                 |
|                          | r:SER451         | l:PRO20        | 2.5726            | 160.775                 |

|          |         |        |         |
|----------|---------|--------|---------|
| r:ARG497 | l:PRO20 | 2.0696 | 129.543 |
| r:ARG497 | l:ALA19 | 2.8065 | 164.996 |
| r:LYS537 | l:LEU6  | 2.4322 | 135.489 |
| r:ARG538 | l:GLU1  | 2.8071 | 116.936 |
| r:ARG538 | l:PRO9  | 2.5597 | 131.470 |
| r:ARG538 | l:PRO3  | 2.3190 | 117.634 |

**Table S4.** The interaction of hydrogen bonds between TP and chitin synthase.

| Antimicrobial peptide         | Receptor residue | Ligand residue | Hydrogen bond [Å] | Hydrogen bond angle [°] |
|-------------------------------|------------------|----------------|-------------------|-------------------------|
| AMP_04_D10K_G11I_S14L<br>(TP) | r:SER534         | l:ASP8         | 2.4062            | 131.540                 |
|                               | r:VAL383         | l:LYS10        | 2.3032            | 140.361                 |
|                               | r:GLU241         | l:LYS10        | 2.0644            | 149.860                 |
|                               | r:GLN245         | l:LYS10        | 2.2089            | 124.333                 |
|                               | r:ASP382         | l:ALA13        | 2.2670            | 148.960                 |
|                               | r:PRO454         | l:LEU14        | 1.9229            | 169.958                 |
|                               | r:ASP440         | l:GLY18        | 2.5774            | 119.957                 |
|                               | r:LYS355         | l:GLY2         | 1.9236            | 143.620                 |
|                               | r:SER436         | l:PRO16        | 2.1211            | 157.251                 |
|                               | r:SER436         | l:LEU17        | 2.3506            | 101.568                 |
|                               | r:SER451         | l:PRO20        | 2.5739            | 160.843                 |
|                               | r:ARG497         | l:PRO20        | 2.0620            | 130.102                 |
|                               | r:ARG497         | l:A19          | 2.8067            | 165.384                 |
|                               | r:LYS537         | l:LEU6         | 2.4301            | 135.709                 |
|                               | r:ARG538         | l:GLU1         | 2.9462            | 114.847                 |
|                               | r:ARG538         | l:PRO9         | 2.4624            | 134.716                 |
|                               | r:ARG538         | l:PRO3         | 2.4198            | 118.125                 |
|                               | r:ARG538         | l:GLU1         | 3.0346            | 114.473                 |
|                               | r:TRP539         | l:ALA13        | 2.8935            | 116.991                 |

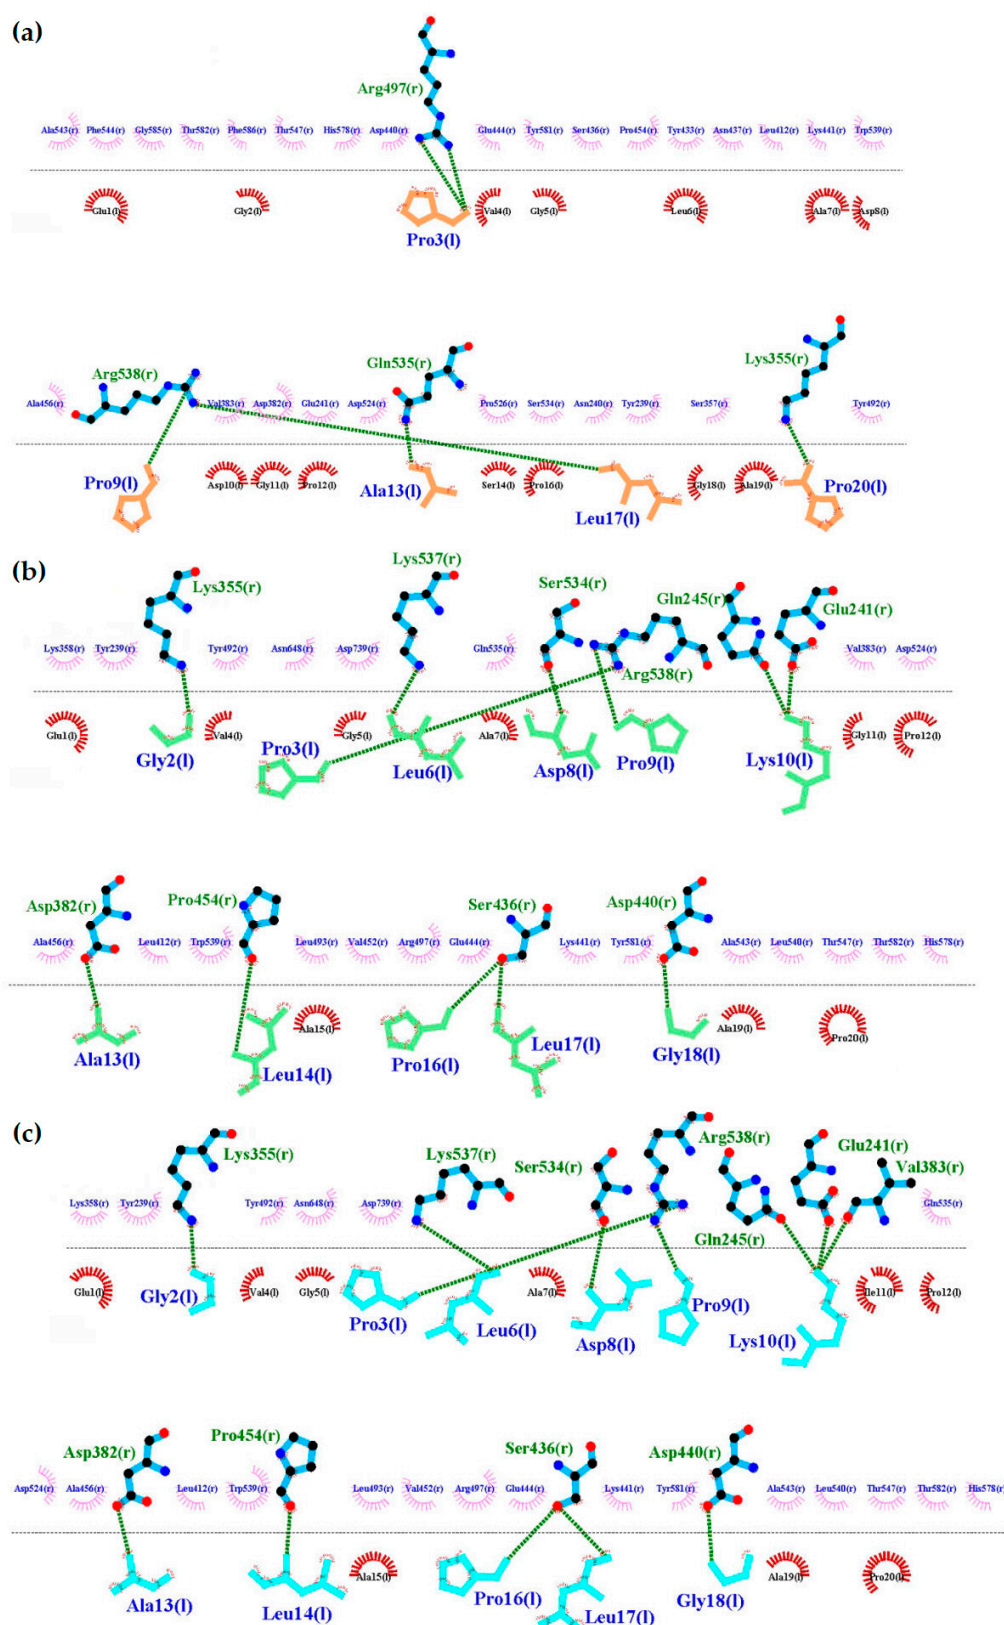

**Figure S1.** The interaction between the receptor (in deep blue) and the ligand displayed by LigPlot+. (a) The 2D interaction map between the receptor and AMP\_04, with AMP\_04 depicted in orange. (b) The 2D interaction map between the receptor and the double mutant DP, with DP represented in green. (c) The 2D interaction map between the receptor and the triple mutant TP, with TP shown in sky blue.

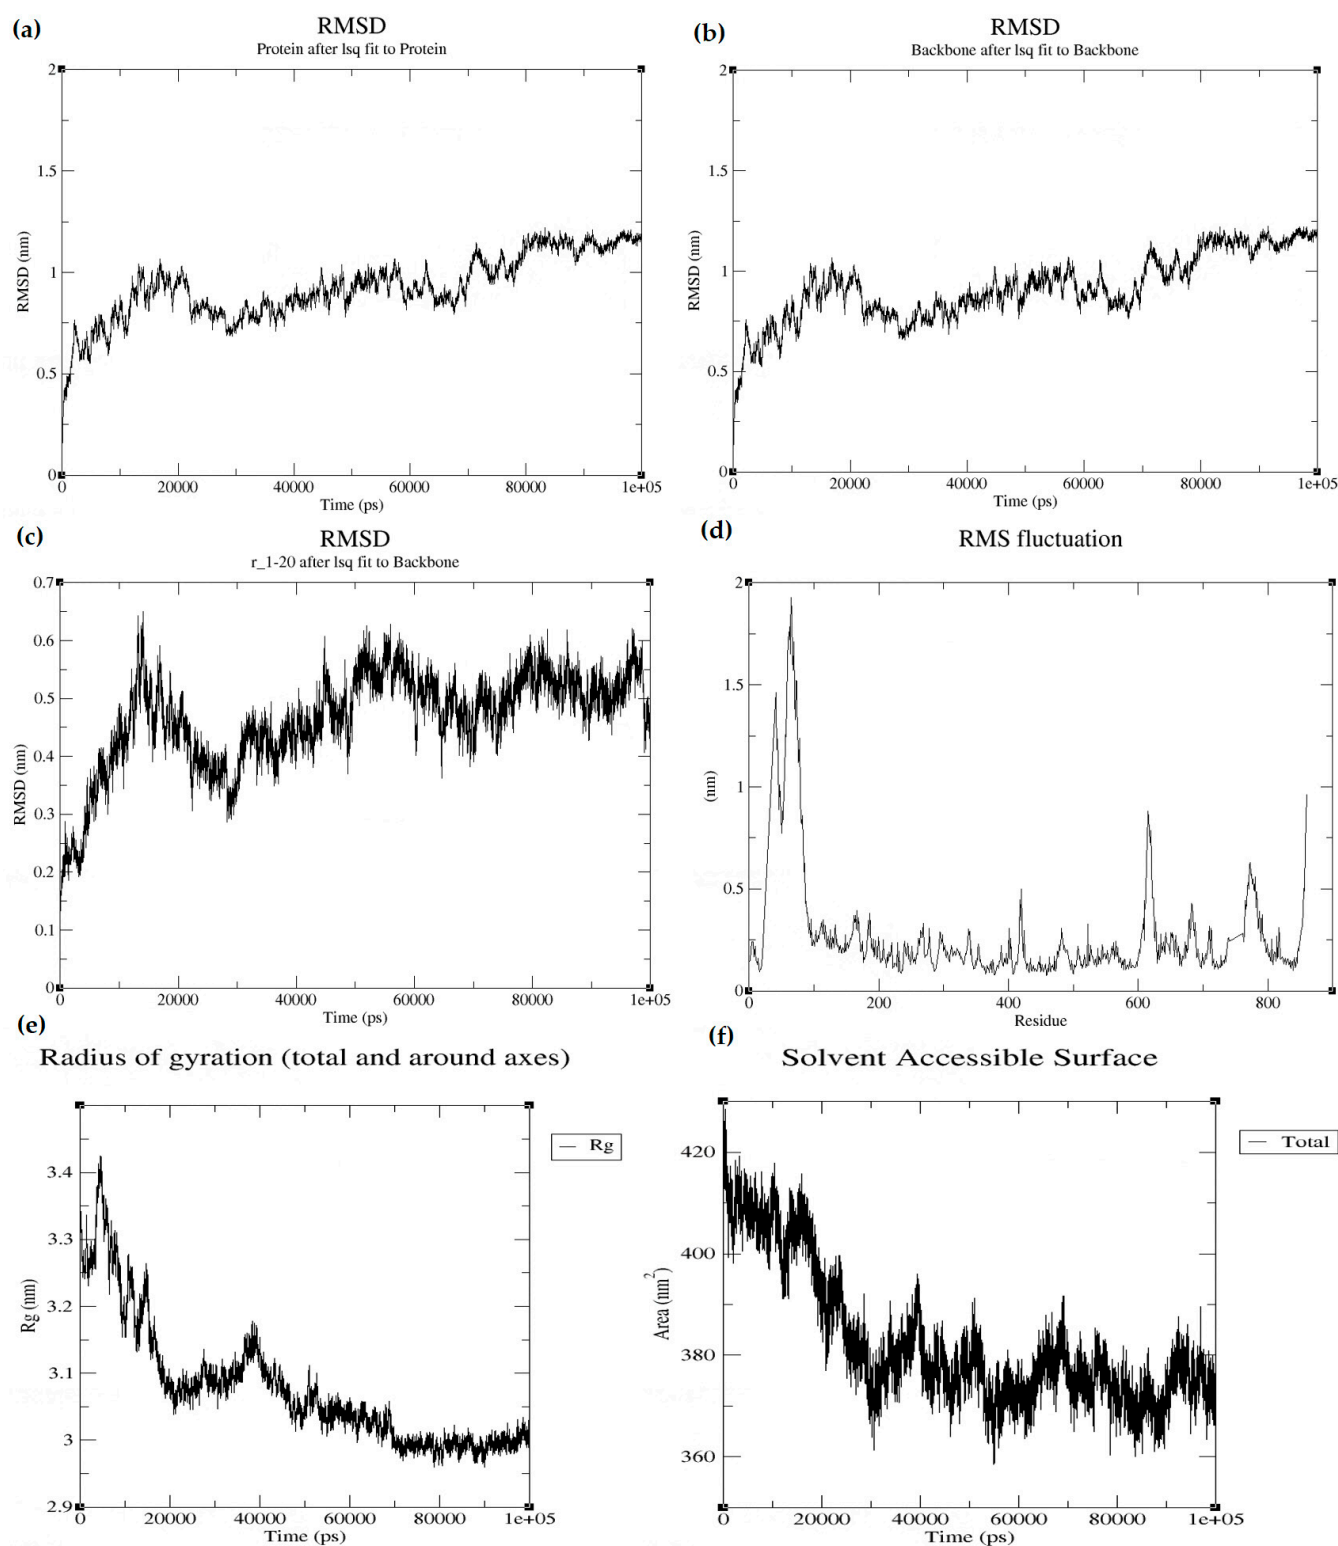

**Figure S2** Molecular dynamics simulation results between TP and chitin synthase. (a) Overall RMSD plot of the receptor-lig and protein. (b) RMSD plot of the receptor-ligand backbone. (c) RMSD plot of the antimicrobial peptide TP. (d) RMSF plot of the overall receptor-ligand protein. (e) Gyration radius plot of the overall receptor-ligand protein. (f) Solvent accessible s urface area plot of the overall receptor-ligand protein.

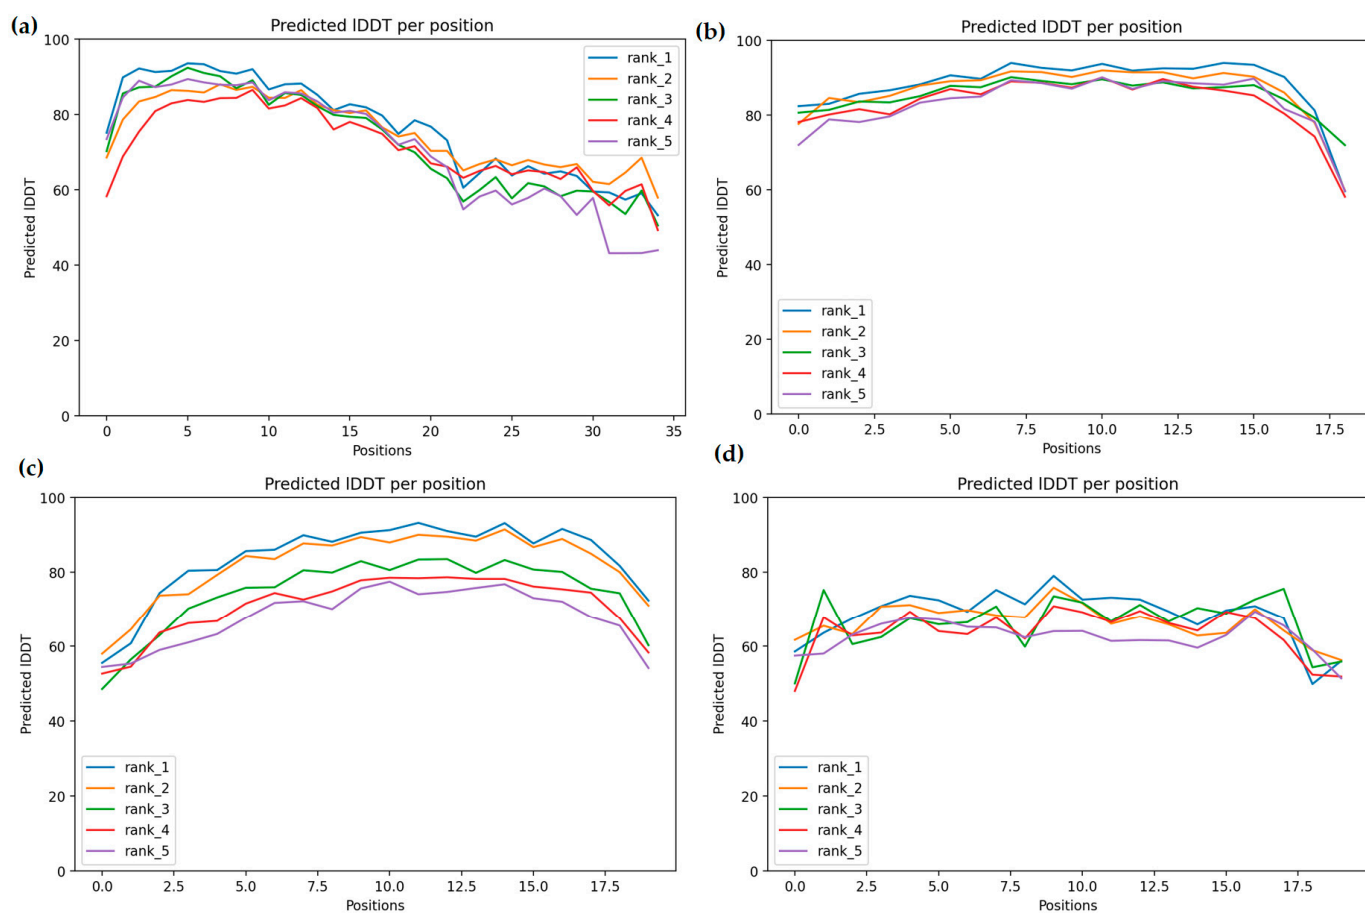

**Figure S3** Predicting pLDDT plots of four antimicrobial peptides using alphafold2. (a) AMP\_01. (b) AMP\_02. (c) AMP\_03. (d) AMP\_04.

---

## Reference

- [1] A. R. Alan and E. D. Earle, Sensitivity of bacterial and fungal plant pathogens to the lytic peptides, MSI-99, magainin II, and cecropin B, *Mol Plant Microbe Interact*, 2002, **15**, 701-708.
- [2] L. Cavallarin, D. Andreu and B. San Segundo, Cecropin A-derived peptides are potent inhibitors of fungal plant pathogens, *Mol Plant Microbe Interact*, 1998, **11**, 218-227.
- [3] M. L. Mangoni, D. Fiocco, G. Mignogna, D. Barra and M. Simmaco, Functional characterisation of the 1-18 fragment of esculentin-1b, an antimicrobial peptide from *Rana esculenta*, *Peptides*, 2003, **24**, 1771-1777.
- [4] Y. Xiao, F. Meng, D. Qiu and X. Yang, Two novel antimicrobial peptides purified from the symbiotic bacteria *Xenorhabdus budapestensis* NMC-10, *Peptides*, 2012, **35**, 253-260.
- [5] G. S. Ali and A. S. Reddy, Inhibition of fungal and bacterial plant pathogens by synthetic peptides: in vitro growth inhibition, interaction between peptides and inhibition of disease progression, *Mol Plant Microbe Interact*, 2000, **13**, 847-859.
- [6] V. Bartova, J. Barta and M. Jarosova, Antifungal and antimicrobial proteins and peptides of potato (*Solanum tuberosum* L.) tubers and their applications, *Appl Microbiol Biotechnol*, 2019, **103**, 5533-5547.
